# Supplementary material for: A delivery system for field application of paratransgenic control
Source: PubMed Central journal article supplement (PMC4477610; doi:10.1186/s12896-015-0175-3), 2015-06-23
Supplement: 12896_2015_175_MOESM1_ESM.pdf [file 12896_2015_175_MOESM1_ESM.pdf]

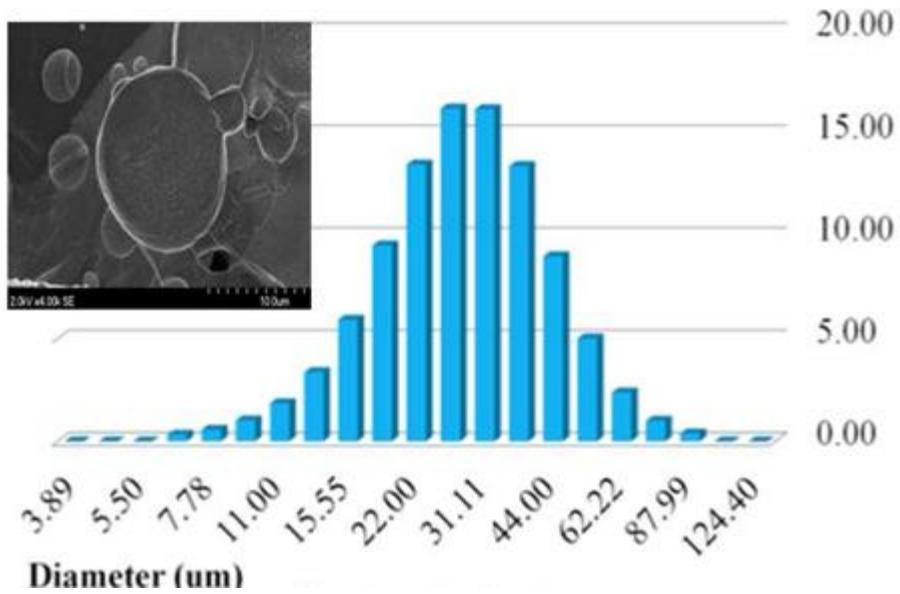

**Figure S3 Size distribution of *P. agglomerans*-containing microparticles.**

Size distribution of *P. agglomerans*-alginate microcapsules generated from a modified aerosolization/coacervation process. (Inset) Electron micrograph of calcium-alginate encapsulated EGFP *P. agglomerans* E325, size = roughly 10um (center) with 3-4µm microcapsules encapsulating single bacteria.
