# Supplementary material for: A delivery system for field application of paratransgenic control
Source: PubMed Central journal article supplement (PMC4477610; doi:10.1186/s12896-015-0175-3), 2015-06-23

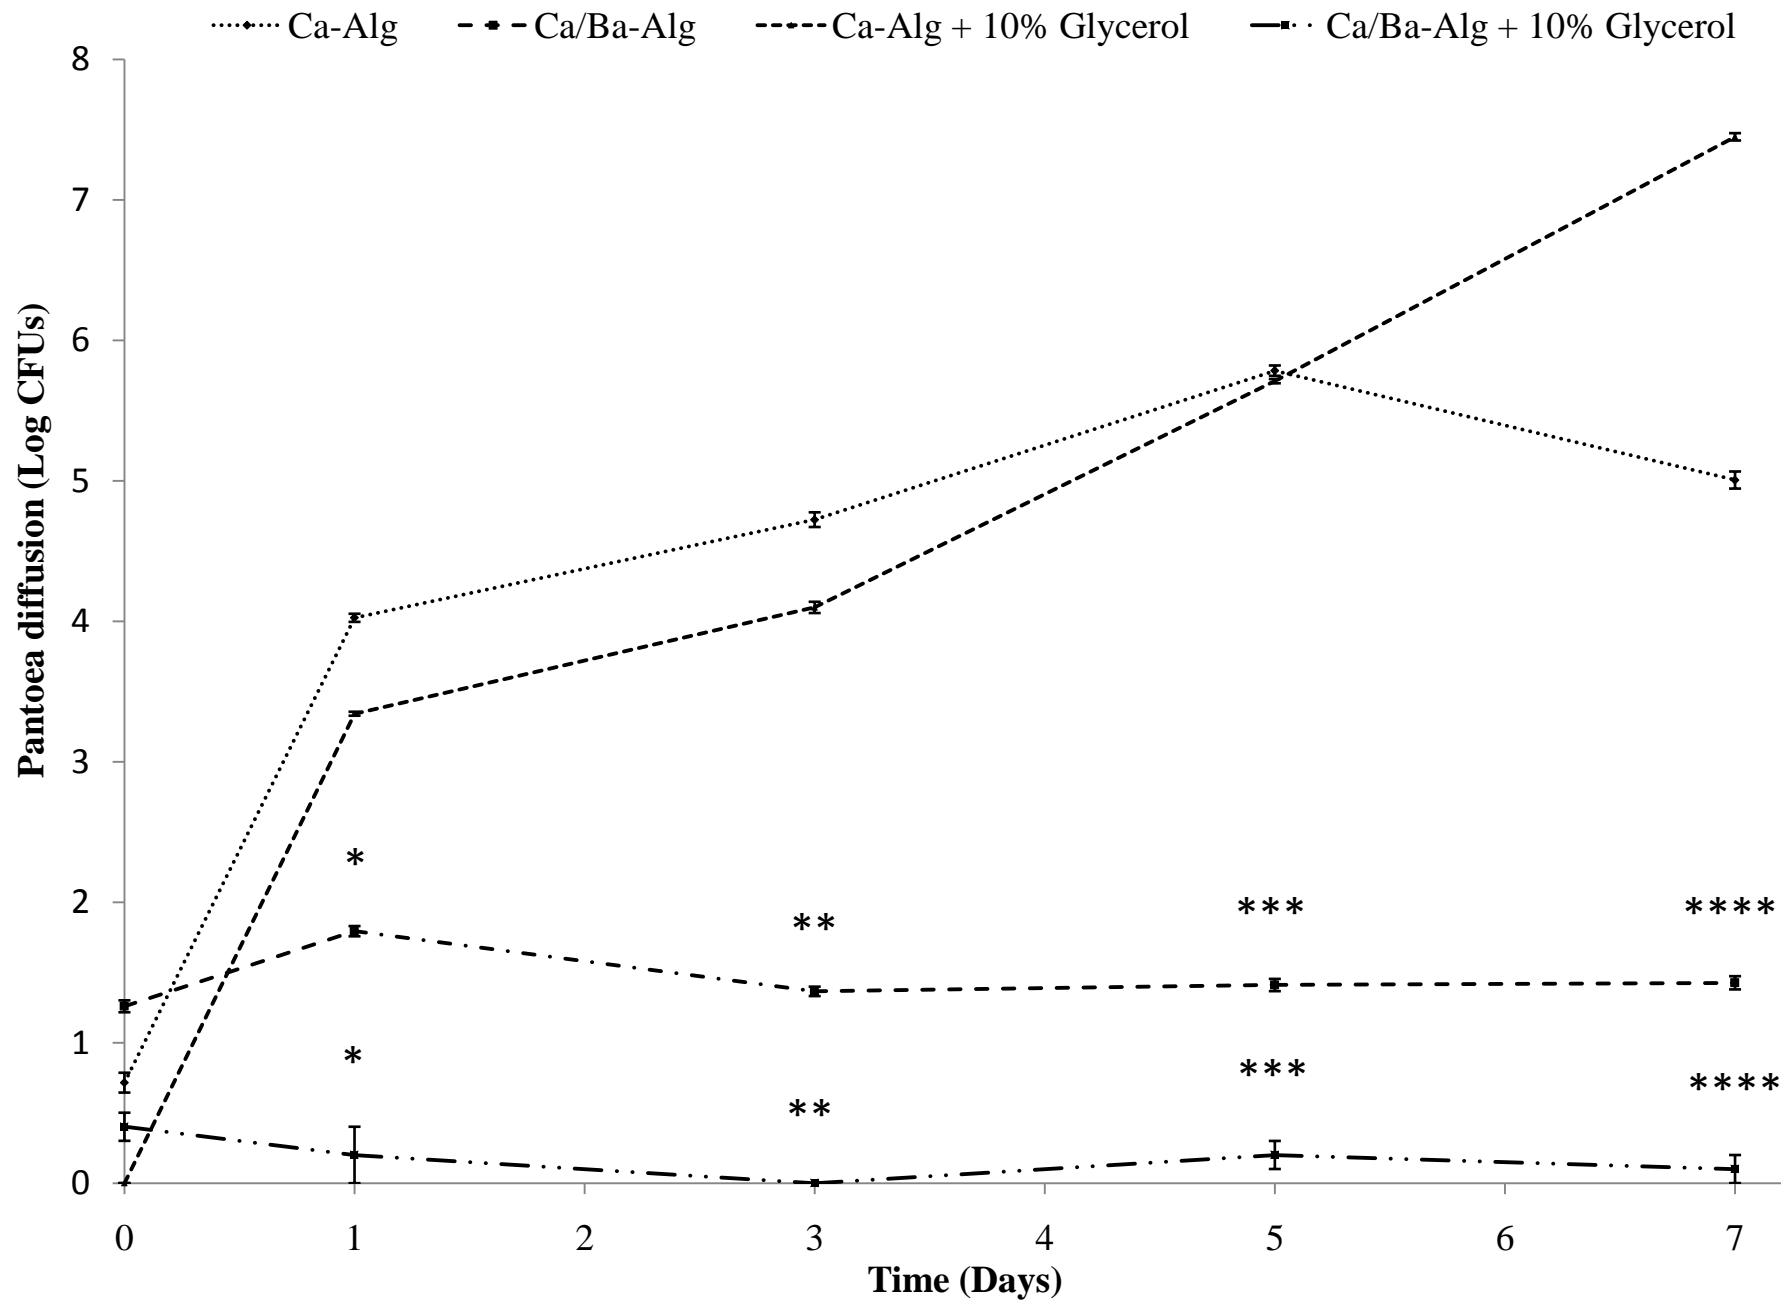

Supplement: 12896_2015_175_MOESM2_ESM.pdf [file 12896_2015_175_MOESM2_ESM.pdf]
