# Supplementary material for: A delivery system for field application of paratransgenic control
Source: PubMed Central journal article supplement (PMC4477610; doi:10.1186/s12896-015-0175-3), 2015-06-23
Supplement: 12896_2015_175_MOESM3_ESM.pdf [file 12896_2015_175_MOESM3_ESM.pdf]

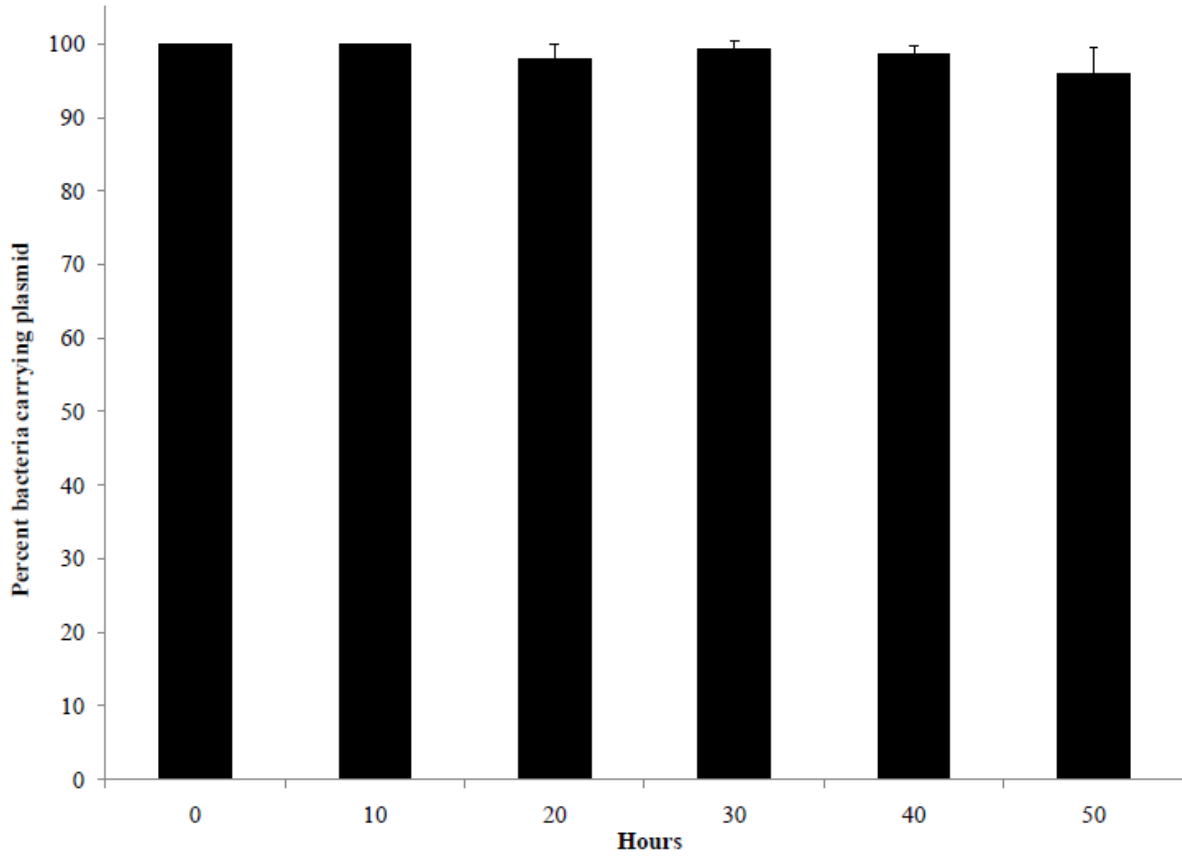

**Figure S2 Transformed *P. agglomerans* revert to its wild type form over time.**

Percent *P. agglomerans* carrying EGFP-containing plasmid pT3078 in a culture kept at mid log phase for 50 hours (~75 generation). *P. agglomerans* lost pT3078 plasmid at a rate of 0.0533 plasmids per generation.
