# Supplementary material for: A delivery system for field application of paratransgenic control
Source: PubMed Central journal article supplement (PMC4477610; doi:10.1186/s12896-015-0175-3), 2015-06-23
Supplement: 12896_2015_175_MOESM4_ESM.pdf [file 12896_2015_175_MOESM4_ESM.pdf]

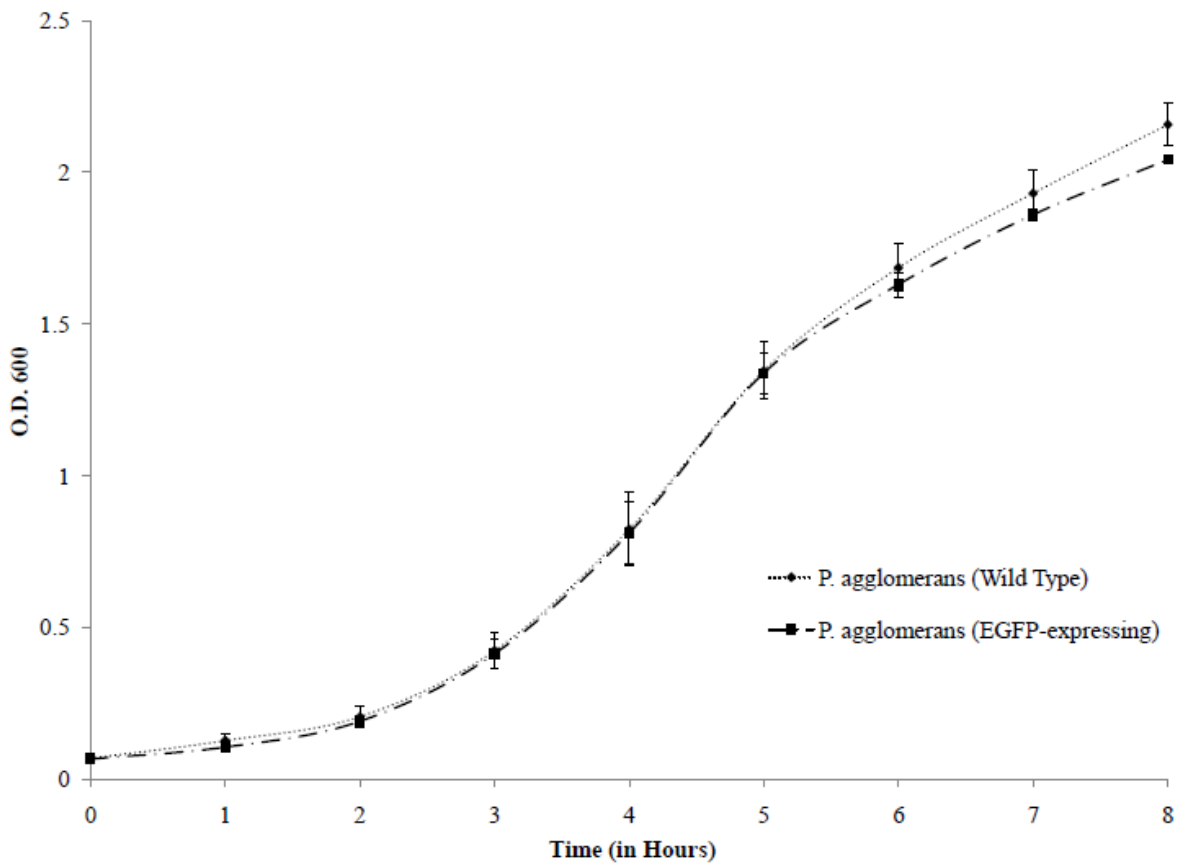

**Figure S1 Plasmid pT3078-5 did not affect growth of *P. agglomerans*.**

Both the wild type and transformed *P. agglomerans* grew at a similar rate, which shows that the plasmid pT3078-5 did not negatively affect growth of the transformed bacteria.
